# Supplementary material
Source: PubMed Central journal article supplement (PMC7963253)
Supplement: 20-00737.pdf [file 20-00737.pdf]

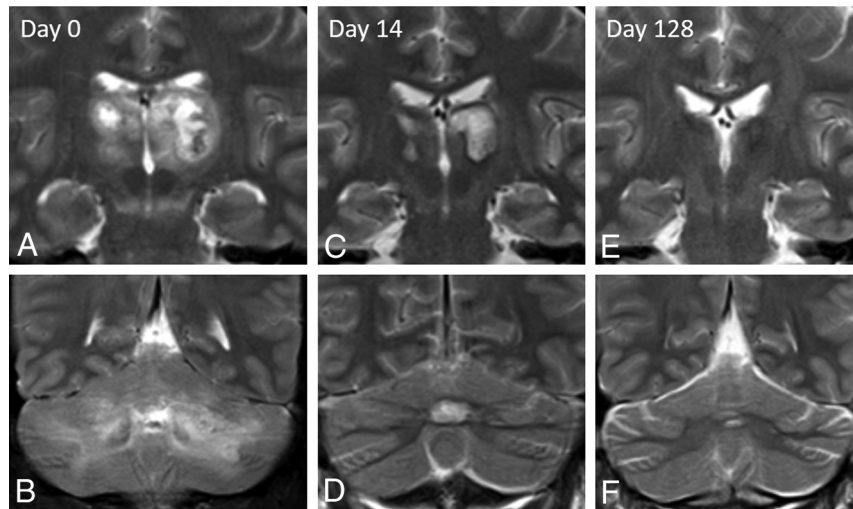

**ON-LINE FIG 1.** An 18-year-old man with ANE, MR imaging brain with T2-weighted coronal sections. *A* and *B*, Bilateral thalamic and cerebellar involvement. Cavitation is seen involving bilateral thalami. *C* and *D*, Images 14 days later show a reduction in bilateral thalamic and cerebellar swelling. *E* and *F*, Images 128 days after initial imaging show residual gliotic changes in the involved areas.

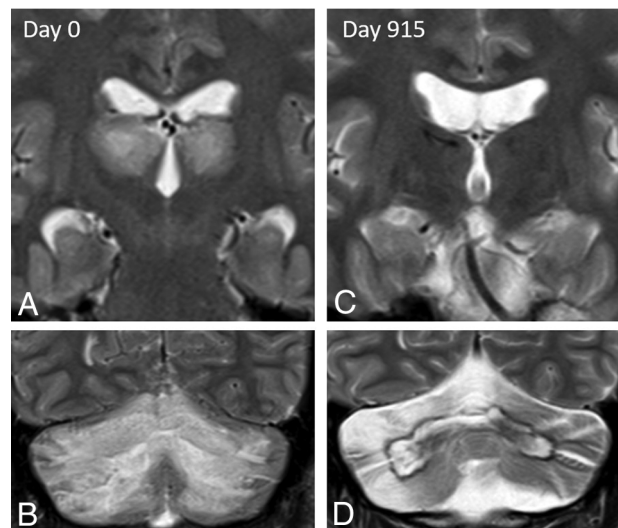

**ON-LINE FIG 2.** A 21-year-old man with ANE, MR imaging of the brain with T2-weighted coronal sections. *A* and *B*, Bilateral thalamic and cerebellar involvement. *C* and *D*, Images 915 days later show residual gliotic changes in the involved region with hemosiderin staining. Cerebellar volume loss is seen on follow-up.

**On-line Table 1: Clinical and laboratory parameters**

|                                        | Cases (n) | Good Outcome (n) | Poor Outcome (n) | Total Cases (n) |
|----------------------------------------|-----------|------------------|------------------|-----------------|
|                                        | 10        | 6                | 4                | 10              |
| Age (years), median (range)            |           | 23.5 (17–30)     | 24 (17–32)       |                 |
| Symptoms                               |           |                  |                  |                 |
| Fever                                  | 10        | 6                | 4                | 10              |
| Seizures                               | 10        | 3                | 2                | 5               |
| Vomiting                               | 10        | 4                | 3                | 7               |
| Loose stools                           | 10        | 2                | 0                | 2               |
| Altered sensorium                      | 10        | 5                | 4                | 9               |
| Respiratory symptoms                   | 10        | 0                | 1                | 1               |
| Sepsis                                 | 10        | 1                | 1                | 2               |
| Elevated CSF protein                   | 5         | 5 of 5           | 0                | 5               |
| Hyperbilirubinemia                     | 10        | 1                | 0                | 1               |
| Transaminitis                          | 10        | 2                | 2                | 4               |
| Abnormal prothrombin time              | 8         | 1 of 4           | 0                | 1               |
| Abnormal activated thromboplastin time | 8         | 1 of 4           | 0                | 1               |
| Renal failure                          | 10        | 2                | 0                | 2               |
| Urinary tract infection                | 9         | 2 of 6           | 0                | 2               |
| Pneumonia                              | 10        | 2                | 2                | 4               |

**On-line Table 2: Viral infection and medical management**

|                           | Cases (n) | Good Outcome (n) | Poor Outcome (n) | Total Cases (n) |
|---------------------------|-----------|------------------|------------------|-----------------|
| Viral etiology identified |           |                  |                  |                 |
| Influenza (H1N1)          |           | 1                | 0                | 1               |
| Dengue                    |           | 1                | 2                | 3               |
| Medical management        |           |                  |                  |                 |
| Intubation                | 10        | 3                | 3                | 6               |
| Immunoglobulin therapy    | 10        | 1                | 0                | 1               |
| Antibiotics               | 10        | 2                | 4                | 6               |
| Antivirals                | 10        | 3                | 4                | 7               |
| Steroids                  | 4         | 2 of 3           | 1                | 3               |

**On-line Table 3: Imaging findings**

|                                                                                                                                   | Cases (n)      | Good Outcome (n) | Poor Outcome (n) | Total Cases (n) |
|-----------------------------------------------------------------------------------------------------------------------------------|----------------|------------------|------------------|-----------------|
| Cases                                                                                                                             | 10             | 6                | 4                |                 |
| Cerebral white matter involvement                                                                                                 | 9 (MR imaging) | 5                | 3                | 8               |
| Periventricular white matter involvement                                                                                          | 9 (MR imaging) | 1                | 2                | 3               |
| Deep white matter involvement                                                                                                     | 9 (MR imaging) | 2                | 2                | 4               |
| Subcortical white matter involvement                                                                                              | 9 (MR imaging) | 3                | 3                | 6               |
| Involvement of the posterior limb of the internal capsule                                                                         | 9 (MR imaging) | 4                | 3                | 7               |
| Cortical gray matter involvement                                                                                                  | 10             | 4                | 2                | 6               |
| Basal ganglia involvement                                                                                                         | 10             | 0                | 0                | 0               |
| Thalamic involvement                                                                                                              | 10             | 6                | 4                | 10              |
| Symmetric                                                                                                                         |                | 4                | 2                |                 |
| Asymmetric                                                                                                                        |                | 2                | 2                |                 |
| <50% thalamic involvement                                                                                                         |                | 0                | 0                |                 |
| >50% but not near-complete thalamic involvement                                                                                   |                | 3                | 0                | 3               |
| Near-complete thalamic involvement                                                                                                |                | 3                | 4                | 7               |
| Brain stem involvement                                                                                                            | 10             | 4                | 4                | 8               |
| Substantia nigra involvement                                                                                                      | 10             | 0                | 0                | 0               |
| Cerebellar involvement                                                                                                            | 10             | 6                | 4                | 10              |
| Central                                                                                                                           |                | 0                | 0                | 0               |
| Peripheral                                                                                                                        |                | 2                | 1                | 3               |
| Both central and peripheral                                                                                                       |                | 4                | 3                | 7               |
| Symmetric                                                                                                                         |                | 3                | 2                | 5               |
| Asymmetric                                                                                                                        |                | 3                | 2                | 5               |
| Cerebellar peduncle involvement                                                                                                   | 10             | 2                | 0                | 2               |
| Presence of diffusion restriction                                                                                                 | 9              | 6 of 6           | 3                | 9               |
| Diffusion restriction involving white matter                                                                                      | 9              | 2 of 6           | 2                | 4               |
| Diffusion restriction involving gray matter                                                                                       | 9              | 2 of 6           | 3                | 5               |
| Diffusion restriction involving brain stem                                                                                        | 9              | 4 of 6           | 3                | 7               |
| Diffusion restriction involving cerebellum                                                                                        | 9              | 6 of 6           | 3                | 9               |
| Trilaminar pattern on ADC                                                                                                         | 9              | 6 of 6           | 3                | 9               |
| Parenchymal cavitation                                                                                                            | 10             | 1                | 0                | 1               |
| Microhemorrhage (seen as foci of blooming on susceptibility-weighted sequence on MR imaging and small hyperattenuated foci on CT) | 10             | 6                | 3                | 9               |

**On-line Table 4: Underlying viral trigger and clinical status at follow-up**

| Patient No. | Age (years) | Sex    | Underlying Viral Trigger | Clinical Status at Follow-Up                                                     | Follow-Up Period (months) |
|-------------|-------------|--------|--------------------------|----------------------------------------------------------------------------------|---------------------------|
| 1           | 17          | Male   | H1N1                     | Required minimal support while walking                                           | 1                         |
| 2           | 17          | Male   |                          | Death                                                                            | 0                         |
| 3           | 18          | Male   | Dengue                   | Independent in ADLs, mild residual dysarthria, bithalamic hand, and ocular palsy | 6                         |
| 4           | 19          | Male   | Dengue                   | Death                                                                            | 0                         |
| 5           | 22          | Male   |                          | Developed aggression with emotional lability, no motor deficits                  | 76                        |
| 6           | 25          | Male   |                          | Tracheostomy removed, independent in ADL, mild residual motor deficits           | 6                         |
| 7           | 29          | Female |                          | Aggressive behavior, otherwise normal                                            | 34                        |
| 8           | 29          | Male   |                          | Death                                                                            | 0                         |
| 9           | 30          | Male   |                          | Independent in ADLs, mild residual motor deficits                                | 3                         |
| 10          | 32          | Female | Dengue                   | Death                                                                            | 0                         |

**Note:**—ADL indicates activity of daily living.
